# Supplementary material
Source: PubMed Central journal article supplement (PMC8010341)
Supplement: mmc1.pdf [file mmc1.pdf]

**Supplemental Table 1: Association between treatment and death as an outcome.**

|                               | <b>African American, n (%)</b> | <b>P-Value</b> | <b>Caucasian n (%)</b> | <b>P-Value</b> | <b>Hispanic n (%)</b> | <b>P-Value</b> | <b>Overall n (%)</b> | <b>P-Value</b> |
|-------------------------------|--------------------------------|----------------|------------------------|----------------|-----------------------|----------------|----------------------|----------------|
| <b>Total N (%)</b>            | 309 (69.1)                     |                | 27 (6)                 |                | 111 (24.8)            |                | 447 (100)            | 0.023*         |
| <b>Deceased</b>               | 56 (18.1)                      |                | 5 (18.5)               |                | 8 (7.3)               |                | 71 (15.5)            |                |
| <b>ICU Admission</b>          | 38 (12.3)                      | <0.001         | 5 (18.5)               | 0.925          | 10 (9.2)              | 0.004          | 53 (11.9)            | <0.001         |
| Survivors                     | 21 (55.3)                      |                | 4 (80)                 |                | 7 (70)                |                | 32 (60.4)            |                |
| Deceased                      | 17 (44.7)                      |                | 1 (20)                 |                | 3 (30)                |                | 21 (39.6)            |                |
| <b>ICU Transfer</b>           | 73 (24.3)                      | <0.001         | 8 (30.7)               | 0.115          | 18 (16.5)             | <0.001         | 99 (22.8)            | <0.001         |
| Survivors                     | 35 (47.9)                      |                | 5 (62.5)               |                | 12 (66.7)             |                | 52 (52.5)            |                |
| Deceased                      | 38 (52.1)                      |                | 3 (37.5)               |                | 6 (33.3)              |                | 47 (47.5)            |                |
| <b>Sepsis</b>                 | 109 (35.7)                     | <0.001         | 7 (25.9)               | 0.426          | 23 (22.1)             | 0.004          | 139 (31.9)           | <0.001         |
| Survivors                     | 71 (65.1)                      |                | 5 (71.4)               |                | 18 (78.3)             |                | 94 (67.6)            |                |
| Deceased                      | 38 (34.9)                      |                | 2 (28.6)               |                | 5 (21.7)              |                | 45 (32.4)            |                |
| <b>Length of Stay (Days)</b>  | 10.1                           | 0.15           | 9.2                    | 0.58           | 6.9                   | 0.084          | 9.3                  | 0.036          |
| Survivors Mean                | 10.4                           |                | 9.6                    |                | 6.6                   |                | 8.8                  |                |
| Deceased Mean                 | 11.4                           |                | 7.4                    |                | 11.6                  |                | 11.6                 |                |
| <b>Vasopressors</b>           | 31 (10.1)                      | <0.001         | 1 (3.7)                | 0.033          | 5 (4.6)               | <0.001         | 37 (8.4)             | <0.001         |
| Survivors                     | 8 (25.8)                       |                | 0 (0)                  |                | 0 (0)                 |                | 8 (21.6)             |                |
| Deceased                      | 23 (74.2)                      |                | 1 (100)                |                | 5 (100)               |                | 29 (78.4)            |                |
| <b>Remdesivir</b>             | 42 (13.6)                      | 0.252          | 5 (18.5)               | 0.925          | 15 (13.8)             | 0.043          | 62 (14)              | 0.804          |
| Survivors                     | 37 (88.1)                      |                | 4 (80)                 |                | 12 (80)               |                | 53 (85.5)            |                |
| Deceased                      | 5 (11.9)                       |                | 1 (20)                 |                | 3 (20)                |                | 9 (14.5)             |                |
| <b>Tocilizumab</b>            | 1 (0.3)                        | 0.639          | 0 (0)                  | N/A            | 0 (0)                 | N/A            | 1 (0.2)              | 0.669          |
| Survivors                     | 1 (100)                        |                | 0 (0)                  |                | 0 (0)                 |                | 1 (100)              |                |
| Deceased                      | 0 (0)                          |                | 0 (0)                  |                | 0 (0)                 |                | 0 (0)                |                |
| <b>Mechanical Ventilation</b> | 47 (15.3)                      | <0.001         | 3 (11.1)               | 0.023          | 9 (8.3)               | <0.001         | 59 (13.3)            | <0.001         |
| Survivors                     | 16 (34)                        |                | 1 (33.3)               |                | 3 (33.3)              |                | 20 (33.9)            |                |
| Deceased                      | 31 (66)                        |                | 2 (66.7)               |                | 6 (66.7)              |                | 39 (66.1)            |                |

\*Comparing lethality rate between ethnicities
